# Supplementary material for: Tracking the Molecular Evolution of Calcium Permeability in a Nicotinic Acetylcholine Receptor
Source: PubMed Central journal article supplement — Mol Biol Evol. 2014 Sep 5;31(12):3250–65. doi: 10.1093/molbev/msu258 (PMC4245820; doi:10.1093/molbev/msu258), 2014-09-05
Supplement: supp_msu258_Supplementary_fig_2.pdf [file supp_msu258_Supplementary_fig_2.pdf]

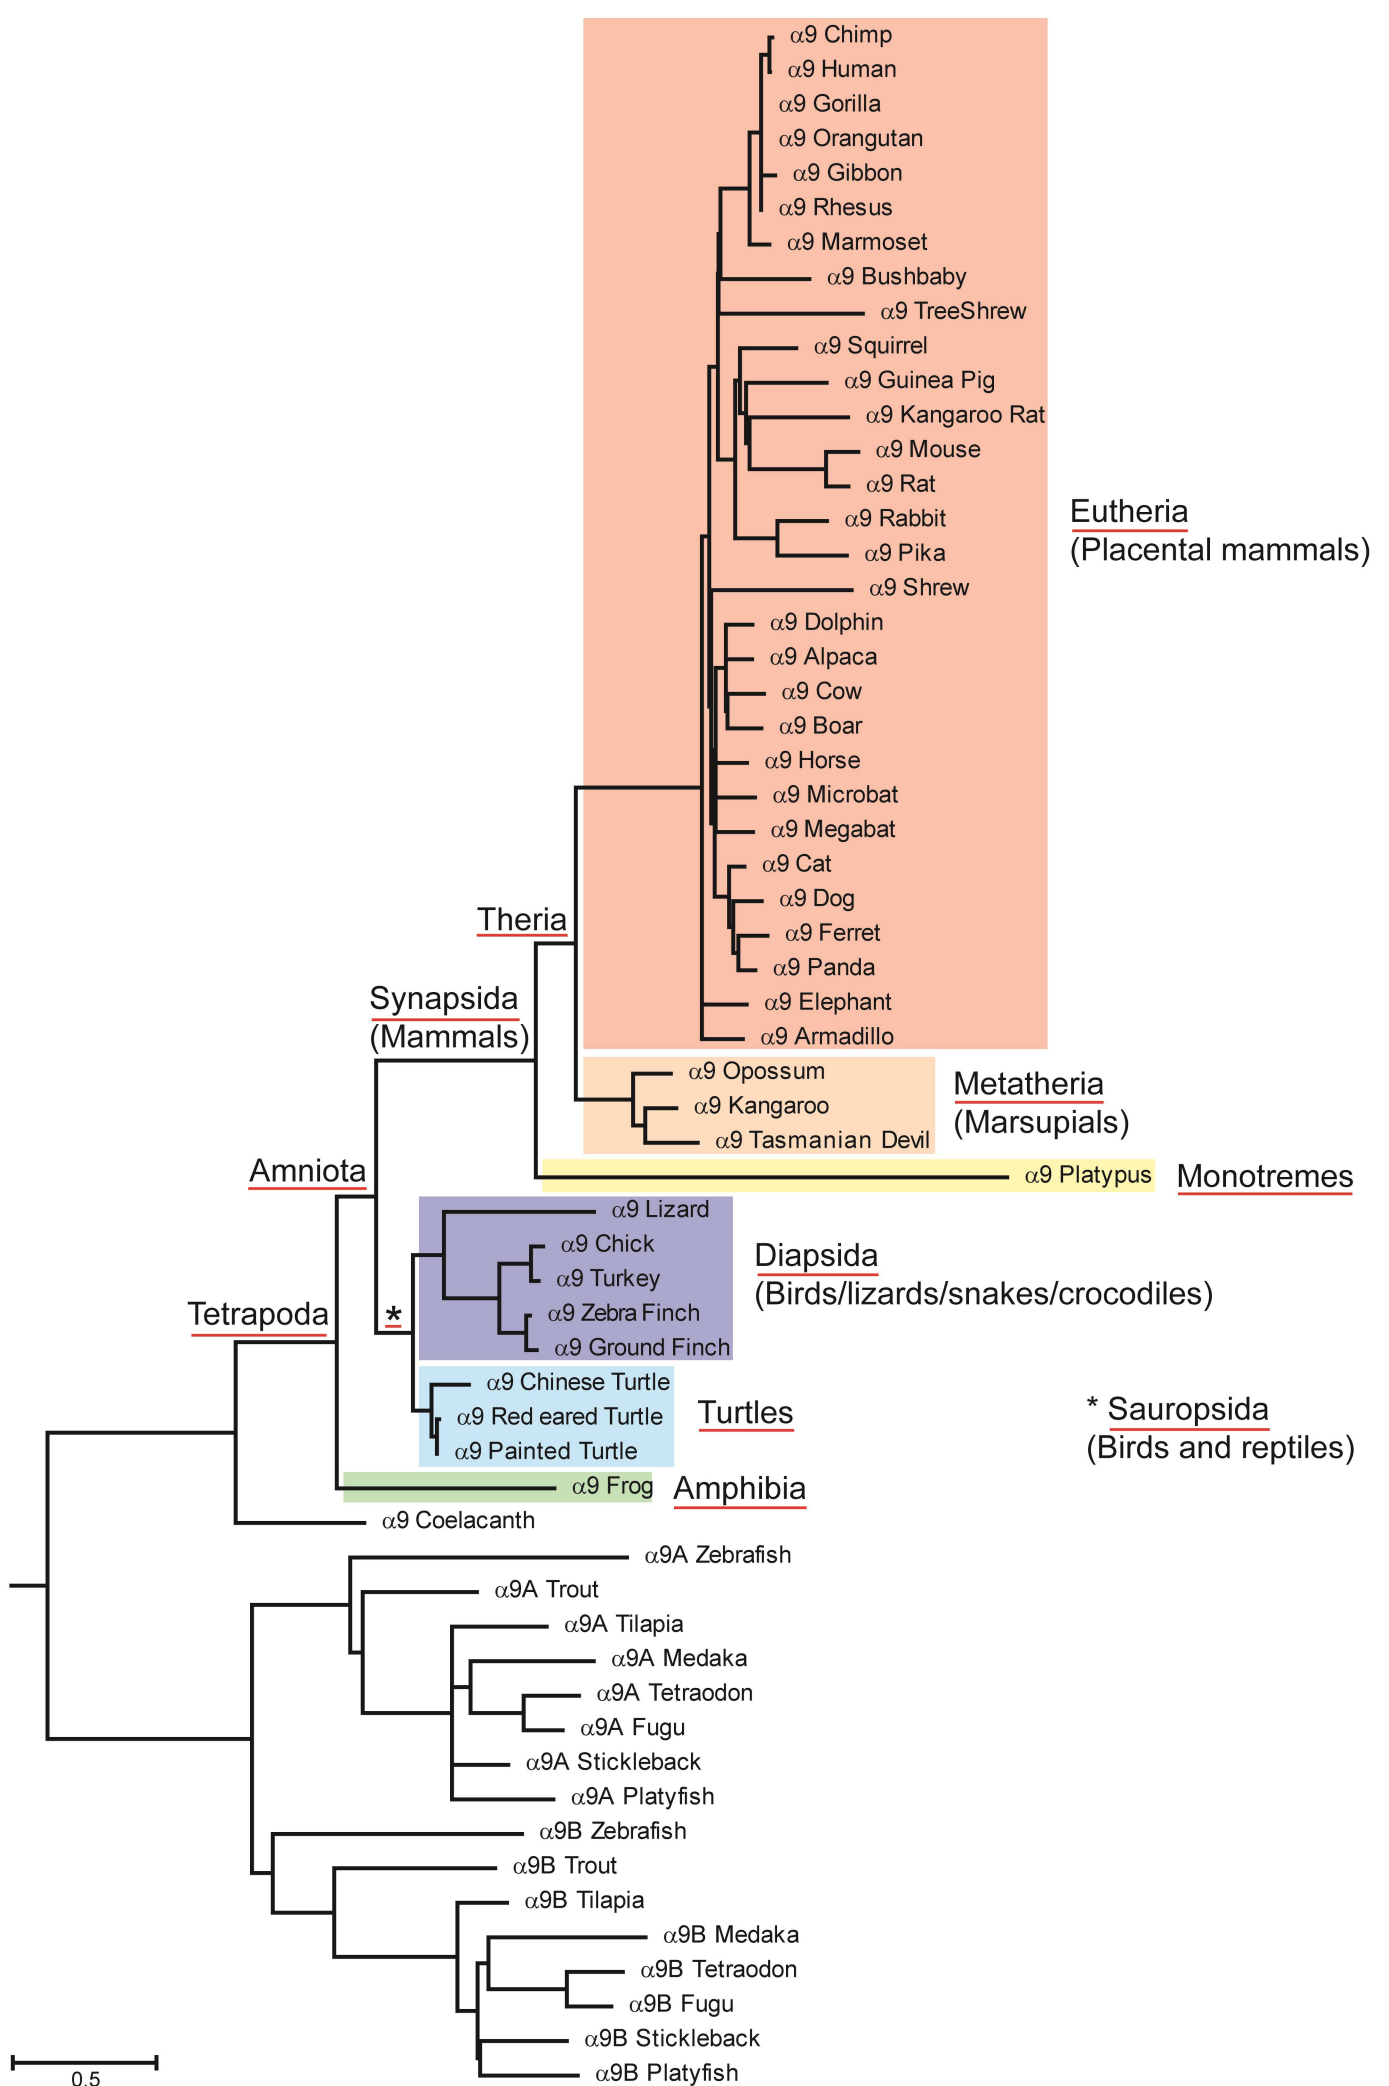

**Supplementary figure 2.** *Phylogeny employed in the ancestral sequence reconstruction of  $\alpha 9$  subunits.* Underlined in red are the names of the major group nodes for which ancestral reconstructed sequences are included in the alignment of supplementary figure 3. Branch lengths represent genetic distance (i.e. number of substitutions, synonymous or non-synonymous per site).
