# Supplementary material for: Tracking the Molecular Evolution of Calcium Permeability in a Nicotinic Acetylcholine Receptor
Source: PubMed Central journal article supplement — Mol Biol Evol. 2014 Sep 5;31(12):3250–65. doi: 10.1093/molbev/msu258 (PMC4245820; doi:10.1093/molbev/msu258), 2014-09-05
Supplement: supp_msu258_Supplementary_fig_4.pdf [file supp_msu258_Supplementary_fig_4.pdf]

Chick  $\alpha 9N110D\alpha 10$

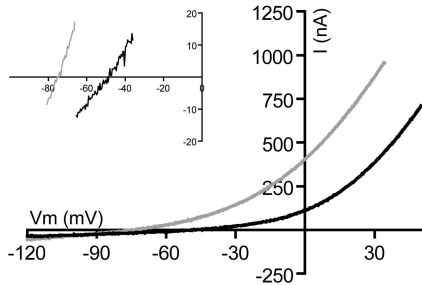

Chick  $\alpha 9F127S\alpha 10$

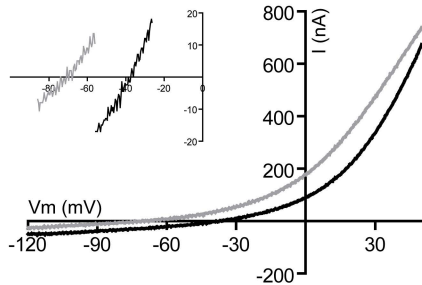

Chick  $\alpha 9D-4'A\alpha 10$

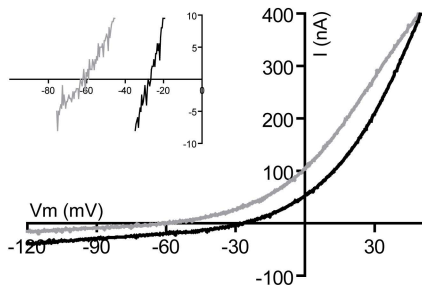

Chick  $\alpha 9N110D/F127S/D-4'A\alpha 10$

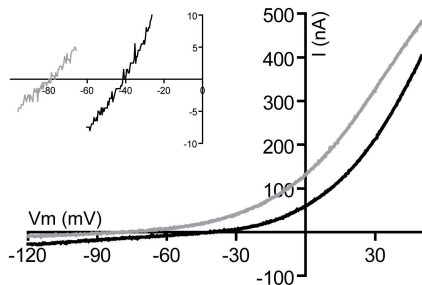

**Supplementary fig. 4.** *Chicken mutant receptors. Relative calcium permeability.* Representative I-V curves obtained by application of voltage ramps (-120 to +50 mV, 2 s) at the plateau of the response to 100  $\mu$ M ACh in oocytes superfused with N-methyl glucamine-based solutions containing different  $\text{Ca}^{2+}$  concentrations (0.5 and 5 mM), for oocytes expressing chicken  $\alpha 9\alpha 10$  mutant receptors. Insets: magnification near the  $E_{rev}$ . Upper panels, extracellular vestibule mutant receptors: chicken  $\alpha 9N110D\alpha 10$  (left) and chick  $\alpha 9F127S\alpha 10$  (right). Lower panels, chicken  $\alpha 9D-4'A\alpha 10$  mutant receptor (left) and chicken  $\alpha 9N110D/F127S/D-4'A\alpha 10$  triple mutant receptor (right).
