# Supplementary material for: Tracking the Molecular Evolution of Calcium Permeability in a Nicotinic Acetylcholine Receptor
Source: PubMed Central journal article supplement — Mol Biol Evol. 2014 Sep 5;31(12):3250–65. doi: 10.1093/molbev/msu258 (PMC4245820; doi:10.1093/molbev/msu258), 2014-09-05
Supplement: supp_msu258_Supplementary_Tables.pdf [file supp_msu258_Supplementary_Tables.pdf]

**Supplementary Table 1.** Calcium permeability of  $\alpha 9\alpha 10$  wild type, mutant and chimeric receptors.

| Receptor                                   | % resp. post – BAPTA | pCa/pNa            |
|--------------------------------------------|----------------------|--------------------|
| <b>Heteromeric receptors</b>               |                      |                    |
| Rat $\alpha 9\alpha 10$                    | 14.8 ± 3.1 (n=12)    | 7.9 ± 0.6 (n=11)   |
| Chick $\alpha 9\alpha 10$                  | 100.3 ± 14.1 (n=6)** | 2.3 ± 0.3 (n=9)**  |
| <b>Homomeric receptors</b>                 |                      |                    |
| Rat $\alpha 9$                             | 14.3 ± 2.9 (n=7)     | 6.1 ± 1.2 (n=4)    |
| Chick $\alpha 9$                           | 99.5 ± 15.1 (n=4)**  | 2.6 ± 0.3 (n=12)** |
| Chick $\alpha 10$                          | 12.7 ± 4.7 (n=10)    | 6.9 ± 1.0 (n=8)    |
| <b>Hybrid receptors</b>                    |                      |                    |
| Rat $\alpha 9$ /Chick $\alpha 10$          | 21.8 ± 8.2 (n=5)     | 9.0 ± 1.0 (n=7)    |
| Chick $\alpha 9$ /Rat $\alpha 10$          | 103.4 ± 20.0 (n=7)** | N.D.               |
| <b>Rat mutant and chimeric receptors</b>   |                      |                    |
| Rat $\alpha 9D110N\alpha 10$               | 59.8 ± 11.9 (n=6)**  | 5.5 ± 0.3 (n=7)*   |
| Rat $\alpha 9S127F\alpha 10$               | 49.4 ± 8.4 (n=5)*    | 5.4 ± 0.4 (n=5)*   |
| Rat $\alpha 9A24'P\alpha 10$               | 22.1 ± 9.5 (n=3)     | 8.5 ± 1.2 (n=7)    |
| Rat $\alpha 9I7'V/M11'L\alpha 10$          | 23.0 ± 2.9 (n=5)     | 7.0 ± 1.1 (n=5)    |
| Rat $\alpha 9A-4'D\alpha 10$               | 59.5 ± 5.9 (n=4)**   | 4.8 ± 0.3 (n=11)** |
| Rat $\alpha 9(IC-chick \alpha 9)\alpha 10$ | N.D.                 | 8.0 ± 1.4 (n=7)    |
| Rat $\alpha 9D110N/S127F/A-4'D\alpha 10$   | 100.5 ± 13.9 (n=6)** | 3.2 ± 0.4 (n=7)**  |
| <b>Chick mutant receptors</b>              |                      |                    |
| Chick $\alpha 9N110D\alpha 10$             | N.D.                 | 2.3 ± 0.2 (n=5)    |
| Chick $\alpha 9F127S\alpha 10$             | N.D.                 | 2.3 ± 0.1 (n=6)    |
| Chick $\alpha 9D-4'A\alpha 10$             | 40.8 ± 6.0 (n=10)##  | 3.7 ± 0.4 (n=11)#  |
| Chick $\alpha 9N110D/F127S/D-4'A\alpha 10$ | 63.7 ± 8.2 (n=19)#   | 2.7 ± 0.3 (n=6)    |

Values are mean ± S.E.M. n=number of oocytes. *t* test vs rat  $\alpha 9\alpha 10$  receptor, \*  $p < 0.05$ , \*\*  $p < 0.001$ . *t* test vs chicken  $\alpha 9\alpha 10$  receptor, #  $p < 0.05$ , ##  $p < 0.001$ . N.D., not determined.

**Supplementary Table 2.** Accession numbers for extant sequences used in the ancestral sequence reconstruction analysis.

| Species                       | Common name  | Accession number   | Species                   | Common name      | Accession number             |
|-------------------------------|--------------|--------------------|---------------------------|------------------|------------------------------|
| Homo sapiens                  | Human        | ENST00000310169    | Macropus eugenii          | Kangaroo         | ENSMEUT00000010173           |
| Pan troglodytes               | Chimp        | ENSPTRT00000029845 | Monodelphis domestica     | Opossum          | ENSMODT00000026177           |
| Gorilla gorilla               | Gorilla      | ENSGGOT00000016585 | Sarcophilus harrisii      | Tasmanian Devil  | ENSSHAT00000021202           |
| Pongo pygmaeus                | Orangutan    | ENSPPYT00000017774 | Ornitorhynchus anatinus   | Platypus         | ENSOANT00000009111           |
| Nomascus leucogenys           | Gibbon       | ENSNLET00000021872 | Gallus gallus             | Chick            | NM_204760.1                  |
| Macaca mulatta                | Rhesus       | ENSMMUT00000042318 | Meleagris gallopavo       | Turkey           | ENSMGAT00000013757           |
| Callithrix jacchus            | Marmoset     | ENSCJAT00000038044 | Taeniopygia guttata       | Zebrafinch       | ENSTGUT00000009067           |
| Otolemur garnettii            | Bushbaby     | ENSOGAT00000005574 | Geospiza fortis           | Ground Finch     | JH739887:9,834,012-9,840,454 |
| Tupaia belangeri              | Treeshrew    | ENSBET00000001200  | Anolis carolinensis       | Lizard           | ENSACAT00000011801           |
| Mus musculus                  | Mouse        | ENSMUST00000031108 | Trachemys scripta elegans | Red-eared Turtle | AY768813                     |
| Rattus norvegicus             | Rat          | ENSRNOT00000003382 | Chrysemys picta bellii    | Painted turtle   | JH584508:2,534,511-2,540,976 |
| Dipodomys ordii               | Kangaroo rat | ENSDORT00000014382 | Pelodiscus sinensis       | Chinese Turtle   | ENSPSIT00000019878           |
| Cavia porcellus               | Guinea Pig   | ENSCPOT00000008419 | Xenopus tropicalis        | Frog             | ENSXETT00000027968           |
| Spermophilus tridecemlineatus | Squirrel     | ENSSTOT00000004710 | Latimeria chalumnae       | Coelacanth       | ENSLACT00000010953           |
| Oryctolagus cuniculus         | Rabbit       | ENSOCUT00000017103 | Tetraodon nigroviridis    | Tetraodon        | ENSTNIT00000017438           |
| Ochotona princeps             | Pika         | ENSOPRT00000016494 |                           |                  | ENSTNIT00000008010           |
| Bos taurus                    | Cow          | ENSBTAT00000039651 | Takifugu rubripes         | Fugu             | AY299469.1                   |
| Sus scrofa                    | Boar         | ENSSSCT00000032423 |                           |                  | AY299470.1                   |
| Vicugna pacos                 | Alpaca       | ENSVPAT00000000639 | Oryzias latipes           | Medaka           | ENSORLT00000005502           |
| Tursiops truncatus            | Dolphin      | ENSTTRT00000002840 |                           |                  | ENSORLT00000007166           |
| Myotis lucifugus              | Microbat     | ENSMLUT00000000889 | Gasterosteus aculeatus    | Stickleback      | ENSGACT00000023751           |
| Pteropus vampyrus             | Megabat      | ENSPVAT00000003813 |                           |                  | ENSGACT00000021407           |
| Equus caballus                | Horse        | ENSECAT00000008299 | Xiphophorus maculatus     | Platyfish        | ENSXMAT00000008427           |
| Felis catus                   | Cat          | ENSFCAT00000012398 |                           |                  | ENSXMAT00000009716           |
| Canis familiaris              | Dog          | ENSCAFT00000025220 | Oreochromis niloticus     | Tilapia          | ENSONIT00000006179           |
| Mustela putorius furo         | Ferret       | ENSMPUT00000006182 |                           |                  | ENSONIT00000011351           |
| Ailuropoda melanoleuca        | Panda        | ENSAMET00000010609 | Oncorhynchus mykiss       | Trout            | AY611482                     |
| Sorex araneus                 | Shrew        | ENSSART00000006640 |                           |                  | AY037940                     |
| Loxodonta africana            | Elephant     | ENSLAFT00000000185 | Danio rerio               | Zebrafish        | ENSDART000000081942          |
| Dasybus novemcinctus          | Armadillo    | ENSNOT00000010472  |                           |                  | ENSDART000000077335          |

Sequences were downloaded from GenBank ([www.ncbi.nlm.nih.gov/genbank](http://www.ncbi.nlm.nih.gov/genbank)), Ensembl ([www.ensembl.org](http://www.ensembl.org)) and UCSC (<http://genome.ucsc.edu/>) databases. Data for Ground Finch and Painted turtle shows the gene location for the respective UCSC genome browsers.

Supplementary Table 3. Evolutionary history of the 44 sites that show clade-specific non-synonymous substitutions.

| Site        | Eutheria |          | Metatheria           |          | Theria               |          | Monotreme            |          | Mammalia |                      | Diapsida |          | Turtles              |          | Sauropsida  |                      | Amniota     |                      | Amphibia    |                      | Tetrapoda            |                      |                      |
|-------------|----------|----------|----------------------|----------|----------------------|----------|----------------------|----------|----------|----------------------|----------|----------|----------------------|----------|-------------|----------------------|-------------|----------------------|-------------|----------------------|----------------------|----------------------|----------------------|
|             | Rat      | Codon    | Post. Prob.          | Codon    | Post. Prob.          | Codon    | Post. Prob.          | Platypus | Codon    | Post. Prob.          | Chick    | Codon    | Post. Prob.          | Codon    | Post. Prob. | Codon                | Post. Prob. | Codon                | Post. Prob. | Xenopus              | Codon                | Post. Prob.          |                      |
| 33          | AAA<br>K | AAG<br>K | 0.999968<br>1.0      | AAG<br>K | 0.947556<br>0.999976 | AAG<br>K | 0.980355<br>0.995121 | ATG<br>M | ATG<br>M | 0.875919<br>0.987831 | ATG<br>M | ATG<br>M | 0.981199<br>0.999757 | ATG<br>M | ATG<br>M    | 0.984044<br>0.999994 | ATG<br>M    | 0.912263<br>0.997952 | ATG<br>M    | ATG<br>M             | 0.902249<br>0.995508 |                      |                      |
| 37          | GAT<br>D | GAC<br>D | 0.999917<br>1.0      | GAC<br>D | 0.998744<br>0.999996 | GAC<br>D | 0.986087<br>0.999918 | GAC<br>D | GAC<br>D | 0.948283<br>0.995952 | GAA<br>E | GAA<br>E | 0.99648<br>0.998446  | GAA<br>E | GAA<br>E    | 0.999802<br>0.999857 | GAA<br>E    | 0.993511<br>0.98991  | GAC<br>D    | GAC<br>D             | 0.824915<br>0.994705 |                      |                      |
| 93          | ACG<br>T | AAG<br>K | 0.995936<br>0.999645 | AAG<br>K | 0.999306<br>0.999999 | AAG<br>K | 0.988271<br>0.999913 | CGC<br>R | AAG<br>K | 0.933143<br>0.991434 | AAA<br>K | AAA<br>K | 0.662802<br>0.99968  | AAG<br>K | AAG<br>K    | 0.994426<br>0.999999 | AAG<br>K    | 0.804652<br>0.999984 | AAG<br>K    | AAG<br>K             | 0.906185<br>0.999879 |                      |                      |
| 96          | CGA<br>R | CGA<br>R | 0.960023<br>1.0      | AGA<br>R | 0.996165<br>0.999999 | AGA<br>R | 0.679704<br>0.999909 | CGC<br>R | AGA<br>R | 0.674178<br>0.982    | AAG<br>K | AAA<br>K | 0.983338<br>0.999675 | AAA<br>K | AAA<br>K    | 0.97806<br>0.845044  | AAA<br>K    | 0.986518<br>0.996901 | AAA<br>K    | 0.590542<br>0.522337 | AGA<br>R             | AAA<br>K             | 0.577899<br>0.521896 |
| 98          | CAG<br>Q | CAG<br>Q | 0.99992<br>1.0       | CAG<br>Q | 0.998737<br>0.999998 | CAG<br>Q | 0.966128<br>0.999764 | CAG<br>Q | CAG<br>Q | 0.80817<br>0.967166  | AAA<br>K | GAA<br>E | 0.531526<br>0.467214 | GAA<br>E | GAA<br>E    | 0.790863<br>0.845044 | GAA<br>E    | 0.741545<br>0.675684 | GAA<br>E    | GAA<br>E             | 0.717703<br>0.972992 |                      |                      |
| 110         | GAT<br>D | GAC<br>D | 0.999927<br>1.0      | GAC<br>D | 0.998841<br>0.999914 | GAC<br>D | 0.963557<br>0.991988 | AGC<br>S | AAC<br>N | 0.889631<br>0.731713 | AAT<br>N | AAT<br>N | 0.592312<br>0.99998  | AAC<br>N | AAC<br>N    | 0.994375<br>0.99997  | AAC<br>N    | 0.839908<br>0.999976 | AAC<br>N    | AAC<br>N             | 0.967832<br>0.999668 |                      |                      |
| 127         | TCT<br>S | TCT<br>S | 0.999934<br>1.0      | TCT<br>S | 0.998728<br>0.999996 | TCT<br>S | 0.955586<br>0.998858 | TTC<br>F | TTT<br>F | 0.838522<br>0.994938 | TTT<br>F | TTT<br>F | 0.957522<br>0.999997 | TTT<br>F | TTT<br>F    | 0.999253<br>1.0      | TTT<br>F    | 0.978388<br>0.999999 | TTT<br>F    | TTT<br>F             | 0.862442<br>0.999991 |                      |                      |
| 142         | CTC<br>L | CTG<br>L | 0.999643<br>1.0      | CTT<br>L | 0.986843<br>0.999999 | CTG<br>L | 0.706028<br>0.999929 | CTG<br>L | CTG<br>L | 0.620667<br>0.98995  | AAA<br>K | AAA<br>K | 0.993216<br>0.999999 | AAA<br>K | AAA<br>K    | 0.999649<br>0.999999 | AAA<br>K    | 0.986187<br>0.999943 | AAG<br>K    | AAA<br>K             | 0.399004<br>0.968596 |                      |                      |
| 188         | GCC<br>A | GCC<br>A | 0.999398<br>1.0      | GCA<br>A | 0.99058<br>0.999999  | GCC<br>A | 0.617347<br>0.99996  | GCC<br>A | GCC<br>A | 0.549187<br>0.996605 | TCT<br>S | TCT<br>S | 0.943237<br>0.918497 | GCT<br>A | GCT<br>A    | 0.999388<br>0.999388 | GCT<br>A    | 0.970579<br>0.929026 | GCT<br>A    | ACT<br>T             | GCT<br>A             | 0.708181<br>0.836777 |                      |
| 242         | GTC<br>V | GTC<br>V | 0.901521<br>1.0      | GTT<br>V | 0.992323<br>0.999843 | GTT<br>V | 0.704169<br>0.98894  | ATC<br>I | GTT<br>V | 0.441771<br>0.74293  | TTT<br>F | TTT<br>F | 0.959607<br>0.999997 | TTT<br>F | TTT<br>F    | 0.999313<br>1.0      | TTT<br>F    | 0.980779<br>0.999997 | TTT<br>F    | TTT<br>F             | 0.932381<br>0.999955 |                      |                      |
| 246         | ATC<br>I | ATC<br>I | 0.999893<br>1.0      | ATC<br>I | 0.998325<br>0.999997 | ATC<br>I | 0.968441<br>0.999319 | CTC<br>L | CTC<br>L | 0.459063<br>0.768614 | CTT<br>L | CTC<br>L | 0.719474<br>0.999824 | CTC<br>L | CTC<br>L    | 0.992953<br>0.999985 | CTC<br>L    | 0.801886<br>0.997253 | CTC<br>L    | ATT<br>I             | ATT<br>I             | 0.26041<br>0.860318  |                      |
| 249         | GTC<br>V | GTC<br>V | 0.99961<br>1.0       | GTG<br>V | 0.98625<br>0.999999  | GTC<br>V | 0.747431<br>0.999983 | GTC<br>V | GTC<br>V | 0.751173<br>0.999715 | ATT<br>I | GTT<br>V | 0.717027<br>0.59319  | GTT<br>V | GTT<br>V    | 0.997879<br>0.999781 | GTT<br>V    | 0.918802<br>0.983768 | GTC<br>V    | GTC<br>V             | 0.69103<br>0.997998  |                      |                      |
| 258         | AGT<br>S | AGT<br>S | 0.999812<br>1.0      | AGT<br>S | 0.880598<br>0.999998 | AGT<br>S | 0.879335<br>0.999792 | AGC<br>S | AGT<br>S | 0.640856<br>0.96194  | CGA<br>G | GGA<br>G | 0.996629<br>0.999995 | GGA<br>G | GGA<br>G    | 0.999817<br>0.999999 | GCA<br>G    | 0.99594<br>0.999979  | GCA<br>G    | GCA<br>G             | 0.873924<br>0.999721 |                      |                      |
| 264<br>(-4) | GCC<br>A | GCC<br>A | 0.999807<br>1.0      | GCC<br>A | 0.965065<br>0.999999 | GCC<br>A | 0.934727<br>0.999882 | GCT<br>A | GCC<br>A | 0.774575<br>0.972705 | GAC<br>D | GAC<br>D | 0.987182<br>0.999952 | GAC<br>D | GAC<br>D    | 0.999121<br>0.999994 | GAC<br>D    | 0.98158<br>0.99997   | GAC<br>D    | GAT<br>D             | GAC<br>D             | 0.595193<br>0.999652 |                      |
| 275<br>(7)  | ATC<br>I | ATC<br>I | 0.999587<br>0.999988 | GTC<br>V | 0.98052<br>0.999847  | GTC<br>V | 0.842804<br>0.989284 | GTT<br>V | GTT<br>V | 0.61047<br>0.998547  | GTT<br>V | GTT<br>V | 0.994343<br>0.999962 | GTT<br>V | GTT<br>V    | 0.996667<br>0.996153 | GTT<br>V    | 0.995471<br>0.999887 | GTT<br>V    | GTT<br>V             | 0.950968<br>0.999937 |                      |                      |
| 279<br>(11) | ATG<br>M | ATG<br>M | 1.0<br>1.0           | ATG<br>M | 0.999996<br>1.0      | ATG<br>M | 0.999671<br>0.999965 | ATG<br>M | ATG<br>M | 0.97864<br>0.984981  | CTG<br>L | CTG<br>L | 0.624986<br>0.999984 | CTA<br>L | CTG<br>L    | 0.988652<br>0.999998 | CTG<br>L    | 0.995471<br>0.999894 | CTG<br>L    | CTG<br>L             | 0.617643<br>0.998694 |                      |                      |
| 292<br>(24) | GCC<br>A | GCC<br>A | 0.998616<br>0.999994 | CCT<br>P | 0.990677<br>0.999993 | CCT<br>P | 0.636669<br>0.997871 | CCC<br>P | CCT<br>P | 0.658219<br>0.999929 | CCC<br>P | CCT<br>P | 0.870725<br>0.999999 | CCT<br>P | CCT<br>P    | 0.99813<br>1.0       | CTG<br>P    | 0.534754<br>1.0      | CCT<br>P    | CCA<br>P             | CCT<br>P             | 0.818513<br>0.999997 |                      |
| 308         | GCC<br>A | GCC<br>A | 0.993274<br>1.0      | GCC<br>A | 0.998376<br>0.999995 | GCC<br>A | 0.978912<br>0.999454 | GCC<br>A | GCC<br>A | 0.888521<br>0.938851 | ACC<br>T | ACA<br>T | 0.579751<br>0.999987 | ACA<br>T | ACA<br>T    | 0.995165<br>0.999998 | ACA<br>T    | 0.607855<br>0.999971 | ACC<br>T    | ACC<br>T             | 0.794182<br>0.999604 |                      |                      |
| 309         | TTG<br>L | TTG<br>L | 0.999343<br>1.0      | CTG<br>L | 0.537791<br>0.999991 | CTG<br>L | 0.577439<br>0.999242 | CTC<br>L | CTG<br>L | 0.549259<br>0.931341 | ATG<br>M | ATG<br>M | 0.999983<br>0.999999 | ATG<br>M | ATG<br>M    | 0.999999<br>1.0      | ATG<br>M    | 0.999989<br>0.999997 | ATG<br>M    | ATG<br>M             | 0.999842<br>0.999952 |                      |                      |
| 319         | ATG<br>M | ATG<br>M | 1.0<br>1.0           | ATG<br>M | 0.999996<br>1.0      | ATG<br>M | 0.999575<br>0.999985 | ATG<br>M | ATG<br>M | 0.976377<br>0.989684 | ATT<br>I | ATT<br>I | 0.925374<br>0.999985 | ATT<br>I | ATT<br>I    | 0.998304<br>0.999998 | ATT<br>I    | 0.941893<br>0.999969 | ATT<br>I    | ATT<br>I             | 0.651947<br>0.985645 |                      |                      |
| 320         | GTG<br>V | GTG<br>V | 0.999863<br>1.0      | GTG<br>V | 0.997493<br>0.999998 | GTG<br>V | 0.923768<br>0.998663 | GTG<br>V | GTG<br>V | 0.592964<br>0.908957 | ATA<br>I | ATA<br>I | 0.986353<br>0.999981 | ATA<br>I | ATA<br>I    | 0.999929<br>0.999998 | ATA<br>I    | 0.994623<br>0.99994  | ATA<br>I    | ATA<br>I             | 0.924154<br>0.999196 |                      |                      |
| 323         | ATT<br>I | ATC<br>I | 0.999927<br>1.0      | ATC<br>I | 0.99888<br>0.999999  | ATC<br>I | 0.992839<br>0.999992 | ATC<br>I | ATC<br>I | 0.983062<br>0.999924 | GTC<br>V | ATC<br>I | 0.951222<br>0.988072 | ATC<br>I | ATC<br>I    | 0.999266<br>0.999996 | ATC<br>I    | 0.986444<br>0.999731 | ATC<br>I    | ATC<br>I             | 0.973588<br>0.999966 |                      |                      |
| 325         | TTC<br>F | TTC<br>F | 0.999933<br>1.0      | TTC<br>F | 0.998991<br>1.0      | TTC<br>F | 0.993408<br>0.999991 | TTC<br>F | TTC<br>F | 0.960456<br>0.997931 | CAC<br>H | CAC<br>H | 0.954074<br>0.989754 | CAC<br>H | CAC<br>H    | 0.999374<br>0.999991 | CAC<br>H    | 0.976856<br>0.999081 | CTC<br>L    | CTC<br>L             | 0.89598<br>0.65687   |                      |                      |

|     |          |          |                      |          |                      |          |                      |          |          |                      |          |          |                      |          |                      |          |                      |          |                      |          |          |                      |
|-----|----------|----------|----------------------|----------|----------------------|----------|----------------------|----------|----------|----------------------|----------|----------|----------------------|----------|----------------------|----------|----------------------|----------|----------------------|----------|----------|----------------------|
| 328 | GCT<br>A | GCT<br>A | 0.995196<br>1.0      | GCT<br>A | 0.997419<br>0.999998 | GCT<br>A | 0.892862<br>0.999855 | GAG<br>E | GCA<br>A | 0.493543<br>0.979798 | TCA<br>S | TCA<br>S | 0.952928<br>0.917654 | GCA<br>A | 0.999746<br>0.999472 | GCA<br>A | 0.947117<br>0.937386 | GCA<br>A | 0.928055<br>0.946151 | CCA<br>P | GCA<br>A | 0.740914<br>0.533981 |
| 331 | CGG<br>R | CGG<br>R | 0.998102<br>0.999996 | AAA<br>K | 0.997557<br>0.999937 | AAA<br>K | 0.854535<br>0.993233 | AAA<br>K | AAA<br>K | 0.935192<br>0.999367 | AAG<br>K | AAA<br>K | 0.90225<br>0.999783  | CAA<br>Q | 0.998003<br>0.998455 | AAA<br>K | 0.963369<br>0.994791 | AAA<br>K | 0.958549<br>0.999927 | AAG<br>K | AAA<br>K | 0.937724<br>0.999978 |
| 335 | CAC<br>H | CAC<br>H | 0.999704<br>0.999995 | CAG<br>Q | 0.995117<br>0.998904 | CAG<br>Q | 0.548199<br>0.812583 | CAC<br>H | CAG<br>Q | 0.462515<br>0.806577 | CAG<br>Q | CAG<br>Q | 0.492965<br>0.972923 | CAA<br>Q | 0.993318<br>0.999858 | CAG<br>Q | 0.644583<br>0.975235 | CAG<br>Q | 0.539619<br>0.902294 | CGA<br>R | CAG<br>Q | 0.542204<br>0.888208 |
| 343 | AAG<br>K | AAA<br>K | 0.999811<br>1.0      | AAA<br>K | 0.609899<br>0.999993 | AAA<br>K | 0.745984<br>0.997784 | GAC<br>D | GAC<br>D | 0.783314<br>0.971695 | GAC<br>D | GAC<br>D | 0.995155<br>0.999953 | GAC<br>D | 0.999627<br>0.999994 | CAG<br>D | 0.99666<br>0.999982  | GAC<br>D | 0.973365<br>0.999266 | GAC<br>D | GAC<br>D | 0.969443<br>0.997674 |
| 347 | AGG<br>R | AGG<br>R | 0.999923<br>0.999996 | AAG<br>K | 0.999466<br>0.999937 | AAG<br>K | 0.981713<br>0.993243 | AAG<br>K | AAG<br>K | 0.991476<br>0.999379 | AAA<br>K | AAG<br>K | 0.889011<br>0.999993 | AAG<br>K | 0.999172<br>0.999999 | AAG<br>K | 0.97511<br>0.999998  | AAG<br>K | 0.993385<br>0.999985 | AAG<br>K | AAG<br>K | 0.993093<br>0.999981 |
| 349 | TTG<br>L | TTG<br>L | 0.999611<br>1.0      | TTG<br>L | 0.524789<br>0.999988 | TTG<br>L | 0.730763<br>0.996495 | TTC<br>F | TTT<br>F | 0.466321<br>0.983754 | TTT<br>F | TTT<br>F | 0.989112<br>0.999997 | TTT<br>F | 0.999367<br>1.0      | TTT<br>F | 0.982892<br>0.999999 | TTT<br>F | 0.675471<br>0.999964 | TTC<br>F | TTT<br>F | 0.612035<br>0.999991 |
| 359 | CTT<br>L | CTT<br>L | 0.680673<br>0.999999 | ACC<br>T | 0.986025<br>0.999753 | ACC<br>T | 0.558892<br>0.999033 | ACA<br>T | ACA<br>T | 0.602421<br>0.999898 | ACA<br>T | ACA<br>T | 0.996139<br>0.999988 | ACA<br>T | 0.999754<br>0.999215 | ACA<br>T | 0.99477<br>0.999993  | ACA<br>T | 0.799137<br>0.999988 | ACC<br>T | ACA<br>T | 0.755072<br>0.999966 |
| 433 | AAG<br>K | AAG<br>K | 0.999966<br>1.0      | AAG<br>K | 0.99942<br>0.999979  | AAG<br>K | 0.992556<br>0.996635 | TTG<br>L | AAG<br>N | 0.927419<br>0.536267 | AAT<br>N | AAT<br>N | 0.923762<br>0.999982 | AAT<br>N | 0.998268<br>0.999998 | AAT<br>N | 0.939691<br>0.99999  | AAT<br>N | 0.718655<br>0.997755 | AAC<br>N | AAT<br>N | 0.647508<br>0.999564 |
| 435 | CTC<br>L | CTC<br>L | 0.999872<br>1.0      | CTC<br>L | 0.99794<br>1.000000  | CTC<br>L | 0.966429<br>0.999957 | CTG<br>L | CTC<br>L | 0.8213<br>0.990964   | GTT<br>V | GTT<br>V | 0.90968<br>0.997935  | GTT<br>V | 0.991874<br>0.983105 | GTT<br>V | 0.905866<br>0.984785 | TTG<br>F | 0.504518<br>0.66944  | TAC<br>Y | TTC<br>F | 0.831531<br>0.740009 |
| 436 | AAG<br>K | AAA<br>K | 0.998099<br>1.0      | AAA<br>K | 0.999606<br>0.999994 | AAA<br>K | 0.992141<br>0.999393 | AAA<br>K | AAA<br>K | 0.924666<br>0.937147 | CGA<br>R | AGA<br>R | 0.995753<br>0.999996 | AGA<br>R | 0.999873<br>1.0      | AGA<br>R | 0.999008<br>0.999982 | AGA<br>R | 0.990783<br>0.99441  | AGA<br>R | AGA<br>R | 0.992435<br>0.999744 |
| 441 | ACC<br>T | ACC<br>T | 0.995121<br>0.999997 | AAT<br>N | 0.980802<br>0.999984 | AAC<br>N | 0.782498<br>0.994709 | CAC<br>N | AAC<br>N | 0.877683<br>0.990106 | AAC<br>N | AAC<br>N | 0.98792<br>0.999981  | AAC<br>N | 0.964151<br>0.999998 | AAC<br>N | 0.982949<br>0.99998  | AAC<br>N | 0.936589<br>0.99316  | ATA<br>I | AAC<br>N | 0.642084<br>0.69386  |
| 442 | AAC<br>N | AAT<br>N | 0.97425<br>0.999983  | AAT<br>N | 0.98925<br>0.999974  | AAT<br>N | 0.951303<br>0.9951   | AGT<br>S | AGT<br>S | 0.923553<br>0.89845  | CGG<br>R | CGT<br>R | 0.796367<br>0.997699 | CGT<br>R | 0.623181<br>0.999996 | CGT<br>R | 0.814856<br>0.997835 | AGT<br>S | 0.95114<br>0.971402  | AGT<br>S | AGT<br>S | 0.959204<br>0.99819  |
| 443 | TCC<br>S | TCC<br>S | 0.999447<br>0.99999  | GCC<br>A | 0.668732<br>0.999941 | GCC<br>A | 0.757464<br>0.993406 | GCC<br>A | GCC<br>A | 0.647609<br>0.999331 | GCC<br>A | GCT<br>A | 0.539524<br>0.999983 | GCT<br>A | 0.993587<br>0.999998 | GCT<br>A | 0.75733<br>0.999996  | GCT<br>A | 0.71229<br>0.999976  | GCT<br>A | GCT<br>A | 0.761969<br>0.999956 |
| 446 | AGC<br>S | AGT<br>S | 0.584729<br>0.999996 | ATC<br>I | 0.848136<br>0.999967 | ATC<br>I | 0.35655<br>0.963449  | AGC<br>S | ATC<br>I | 0.330706<br>0.9617   | ATT<br>I | ATT<br>I | 0.948061<br>0.996124 | ATT<br>I | 0.997344<br>0.999754 | ATT<br>I | 0.960462<br>0.999815 | ATT<br>I | 0.662485<br>0.995676 | ATC<br>I | ATT<br>I | 0.609413<br>0.990927 |
| 455 | ATA<br>I | ATA<br>I | 0.999915<br>1.0      | ATC<br>I | 0.701751<br>0.999987 | ATA<br>I | 0.57847<br>0.996463  | ATG<br>M | ATG<br>M | 0.943437<br>0.985573 | ATG<br>M | ATG<br>M | 0.999983<br>0.999999 | ATG<br>M | 0.999999<br>1.0      | ATG<br>M | 0.999994<br>1.0      | ATG<br>M | 0.999647<br>0.999976 | ATG<br>M | ATG<br>M | 0.999954<br>0.999998 |
| 469 | GTC<br>V | GTG<br>V | 0.999429<br>0.999999 | GCT<br>A | 0.696203<br>0.996124 | GTC<br>V | 0.344397<br>0.831443 | GTC<br>V | GTC<br>V | 0.71753<br>0.82836   | TTT<br>F | TTC<br>F | 0.840713<br>0.999997 | TTC<br>F | 0.99761<br>1.0       | TTC<br>F | 0.936443<br>0.999997 | TTC<br>F | 0.935329<br>0.998428 | TTC<br>F | TTC<br>F | 0.955683<br>0.999648 |
| 471 | ACC<br>T | ACT<br>T | 0.999859<br>0.999988 | AGT<br>S | 0.997929<br>0.999927 | AGT<br>S | 0.933768<br>0.992577 | AGC<br>S | AGT<br>S | 0.657575<br>0.999137 | AGC<br>S | AGT<br>S | 0.527757<br>0.999977 | AGT<br>S | 0.690869<br>0.999997 | AGT<br>S | 0.576924<br>0.999994 | AGC<br>S | 0.503567<br>0.999967 | AGC<br>S | AGC<br>S | 0.62493<br>0.99994   |
| 476 | GCA<br>A | GCA<br>A | 0.965295<br>1.0      | GCT<br>A | 0.725488<br>0.999998 | GCC<br>A | 0.472878<br>0.999815 | GCC<br>A | GCC<br>A | 0.715269<br>0.971228 | GGG<br>G | GCC<br>G | 0.867877<br>0.999923 | GCC<br>G | 0.998318<br>0.999993 | GCC<br>G | 0.944997<br>0.998758 | GCC<br>G | 0.608731<br>0.642489 | GCC<br>A | GCC<br>G | 0.604591<br>0.640808 |
| 479 | GAT<br>D | GAT<br>D | 0.999865<br>0.999996 | GTT<br>V | 0.369214<br>0.453305 | GTT<br>V | 0.515961<br>0.461885 | GTG<br>V | GTT<br>V | 0.864457<br>0.924135 | GCT<br>A | GTT<br>V | 0.93035<br>0.450021  | ATT<br>I | 0.995934<br>0.995946 | GTT<br>V | 0.935196<br>0.502008 | GTT<br>V | 0.928592<br>0.913722 | GTG<br>V | GTT<br>V | 0.875834<br>0.978764 |

The 42 sites that show clade-specific non-synonymous substitutions are enumerated. Numbering is after rat  $\alpha 9$  subunit; for sites located at or near the TM2 domain, numbering after Miller *et al.*, 1989 is shown between brackets. Sites analyzed by site-directed mutagenesis are highlighted in light blue. Sites located in the MA  $\alpha$ -helix of the intracellular domain, and analyzed by the construction of a chimeric subunit, are highlighted in yellow.

Corresponding codons and aminoacids for the predicted ancestral sequences are shown for the major group nodes: Eutheria (placental mammals), Metatheria (marsupials), Theria, Monotreme, Mammalia, Diapsida (birds, lizards, snakes and crocodiles), Turtles, Sauropsida (birds and reptiles), Amniota, Amphibia and Tetrapoda. For groupings and node locations see the phylogeny of Supplementary figure 3. Between brackets, posterior probabilities of the marginal reconstruction for each character state (see Methods). For the monotreme and amphibian groups codons and aminoacids for extant platypus and frog  $\alpha 9$  sequences, respectively, are shown. Codons and aminoacids of extant rat and chick  $\alpha 9$  sequences are also depicted. Red, mammalian specific aminoacids; blue, sauropsid specific aminoacids; orange, tetrapod specific aminoacid; white, monotreme specific aminoacids; green, amphibian specific aminoacids. The same color coding was used to highlight these 42 sites in the alignment of Supplementary Figure 1.

**Supplementary Table 4.** *pK/pNa of  $\alpha 9\alpha 10$  wild type, mutant and chimeric receptors.*

| Receptor                                   | $E_{rev}$              | pK/pNa                  |
|--------------------------------------------|------------------------|-------------------------|
| <b>Heteromeric receptors</b>               |                        |                         |
| Rat $\alpha 9\alpha 10$                    | $-7.3 \pm 1.6$ (n=20)  | $1.1 \pm 0.2$ (n=6)     |
| Chick $\alpha 9\alpha 10$                  | $-2.7 \pm 0.6$ (n=27)  | $0.9 \pm 0.1$ (n=8)     |
| <b>Homomeric receptors</b>                 |                        |                         |
| Rat $\alpha 9$                             | $-10.8 \pm 2.4$ (n=5)  | $1.2 \pm 0.1$ (n=4)     |
| Chick $\alpha 9$                           | $-2.2 \pm 0.7$ (n=23)  | $1.21 \pm 0.05$ (n=5)   |
| Chick $\alpha 10$                          | $+0.19 \pm 1.9$ (n=14) | $1.26 \pm 0.04$ (n=4)   |
| <b>Hybrid receptors</b>                    |                        |                         |
| Rat $\alpha 9$ Chick $\alpha 10$           | $-4.5 \pm 1.8$ (n=16)  | $1.2 \pm 0.1$ (n=7)     |
| Chick $\alpha 9$ Rat $\alpha 10$           | $-1.9 \pm 0.9$ (n=7)   | N.D.                    |
| <b>Rat mutant and chimeric receptors</b>   |                        |                         |
| Rat $\alpha 9D110N\alpha 10$               | $-6.3 \pm 2.3$ (n=12)  | $1.3 \pm 0.1$ (n=7)     |
| Rat $\alpha 9S127F\alpha 10$               | $-4.7 \pm 1.1$ (n=7)   | $1.3 \pm 0.2$ (n=5)     |
| Rat $\alpha 9A24'P\alpha 10$               | $-4.9 \pm 1.8$ (n=10)  | $1.3 \pm 0.2$ (n=4)     |
| Rat $\alpha 9I7'V/M11'L\alpha 10$          | $-4.4 \pm 1.1$ (n=9)   | $1.3 \pm 0.1$ (n=6)     |
| Rat $\alpha 9A-4'D\alpha 10$               | $-3.0 \pm 0.8$ (n=15)* | $0.51 \pm 0.05$ (n=8)*  |
| Rat $\alpha 9(IC-chick \alpha 9)\alpha 10$ | $-4.8 \pm 1.8$ (n=10)  | $1.0 \pm 0.05$ (n=3)    |
| Rat $\alpha 9D110N/S127F/A-4'D\alpha 10$   | $-2.5 \pm 0.7$ (n=23)* | $0.70 \pm 0.06$ (n=10)* |
| <b>Chick mutant receptors</b>              |                        |                         |
| Chick $\alpha 9N110D\alpha 10$             | $-2.5 \pm 1.0$ (n=9)   | $1.15 \pm 0.05$ (n=6)   |
| Chick $\alpha 9F127S\alpha 10$             | $-1.8 \pm 1.1$ (n=9)   | $1.00 \pm 0.05$ (n=5)   |
| Chick $\alpha 9D-4'A\alpha 10$             | $-0.4 \pm 1.4$ (n=9)   | $0.8 \pm 0.1$ (n=7)     |
| Chick $\alpha 9N110D/F127S/D-4'A\alpha 10$ | $-3.7 \pm 0.6$ (n=9)   | $1.1 \pm 0.1$ (n=4)     |

Values are mean  $\pm$  S.E.M. n=number of oocytes. *t* test vs rat  $\alpha 9\alpha 10$  receptor, \*  $p < 0.05$ . N.D., not determined.
